# Supplementary material
Source: MDPI journal article supplement (https://www.mdpi.com/2078-1547/13/1/7)
Supplement: s1 [file s1]

Archive with 1 entries (1 files):
- challenges-1525544-Supplementary.pdf
