# Supplementary material
Source: MDPI journal article supplement (https://www.mdpi.com/2078-1547/13/1/7)
Supplement: s1 [file s1 › challenges-1525544-Supplementary.pdf]

**Table S1:**

Thank you for your interest in completing our feedback survey for participants of the Why Study Mammographic Density? Conference Webinars held in October 2020. It should only take [5-15] minutes to complete depending on your responses. Please read the Participant Information Sheet. By participating in the survey you are consenting to the terms outlined in this sheet.

**Table S2:****Interview Questions**

Thank you for your interest in completing our feedback survey for participants of the Why Study Mammographic Density? Conference Webinars held in October 2020.

1.1 What is your role?/In what role did you attend the Why Study Mammographic Density? Researcher

1.2 How did you hear about the 2020 Why Study Mammographic Density? Conference Webinars?

1.3 Have you attended the Why Study Mammographic Density? Conference before?

1.3.1 If yes, did you notice any difference in the audiences of the webinars compared with previous face-to-face Why Study Mammographic Density? Conferences?

2.0 When you registered, who did you think the conference was targeted to?

1.4 Did you give a talk at the 2020 conference?

? • Yes (Go to section 2)

? • No (Go to section 3)

**2.0 Talkers (responded “Yes” to 1.4):**

2.1 When preparing your talk for this conference, who did you target your talk to most?

2.2 When preparing your talk for this conference, did you consider community members in the audience more than you would for other conferences where you have spoken at in the past?

2.3 When preparing your talk for this conference, did you think differently about the language you used because of the expected audience?

2.4 When preparing your talk for this conference, did you avoid certain topics because there were community members in the audience?

**3.0 Questions for all (responded “No” to 1.4)**

3.1 During the Why Study Mammographic Density? Conference Webinars, did you ask a question or comment?

3.1.1 If yes, did you gain something from the answer given?

4.1 Do you think it's important to include a variety of participants from different interest groups in scientific meetings? Please give an explanation for your answer.

4.2 What was the key new information that you took away from this conference?

Do you think ...

4.3.1 Online scientific conferences are better than in-person conferences for diversity of participants

4.3.2 Online scientific conferences are better than in-person conferences for scientific advancement

4.3.3 Online scientific conferences are better than in-person conferences for the community

4.3.4 Online scientific conferences are better than in-person conferences for me

4.4 What do you think are the main benefits/challenges of increased diversity of participants from different interest groups at scientific conferences?

4.5 Do you think increased diversity of participants from different interest groups at scientific conferences improves science communication? Please explain your answer.

4.6 Do you prefer online or in-person scientific conferences? Why

? • Online

? • In-person

4.7 If returning to face-to-face conferences reduced the diversity of participants would that reduce the value of the conference in your opinion? Please explain your answer.

5.0 Is there anything else you would like to add?
